# Supplementary material for: Polytypic phase transition in alkyl chain-functionalized valence tautomeric complexes
Source: Royal Society of Chemistry journal article supplement (doi:10.1039/b513807h), 2006-01-01
Supplement: b513807h.pdf [file b513807h.pdf]

***Supporting Information of***  
***Polytypic phase transition***  
***in alkyl chain-functionalized valence tautomeric complexes***

Daisuke Kiriya,<sup>a</sup> Ho-Chol Chang,<sup>\*a,b</sup> Akiko Kamata,<sup>a</sup> and Susumu Kitagawa<sup>\*a</sup>

---

“Department of Synthetic Chemistry and Biological Chemistry, Graduate School of Engineering,

Kyoto University, Nishikyo-ku, Kyoto 615-8510 (Japan)

and

<sup>b</sup>“Structural Ordering and Physical Properties”, PRESTO

Japan Science and Technology Agency (JST), 4-1-8 Honcho Kawaguchi, Saitama,

332-0012 (Japan)

Fax: (+81)75-383-2732

E-mail: chang@sbchem.kyoto-u.ac.jp and kitagawa@sbchem.kyoto-u.ac.jp

***Contents***

**Figure S1.** TG-DTA of the solvated **CoCnbp** ( $n = 0, 1$ , and  $5$ ).

**Figure S2.** XRPD patterns of the solvated and the desolvated **CoCnbp** ( $n = 0, 1$ , and  $5$ ).

**Figure S1.** DSC curves of **CoC9bp** and **CoC13bp** under a scan rate of  $1, 5, 10$ , and  $20 \text{ K min}^{-1}$ .

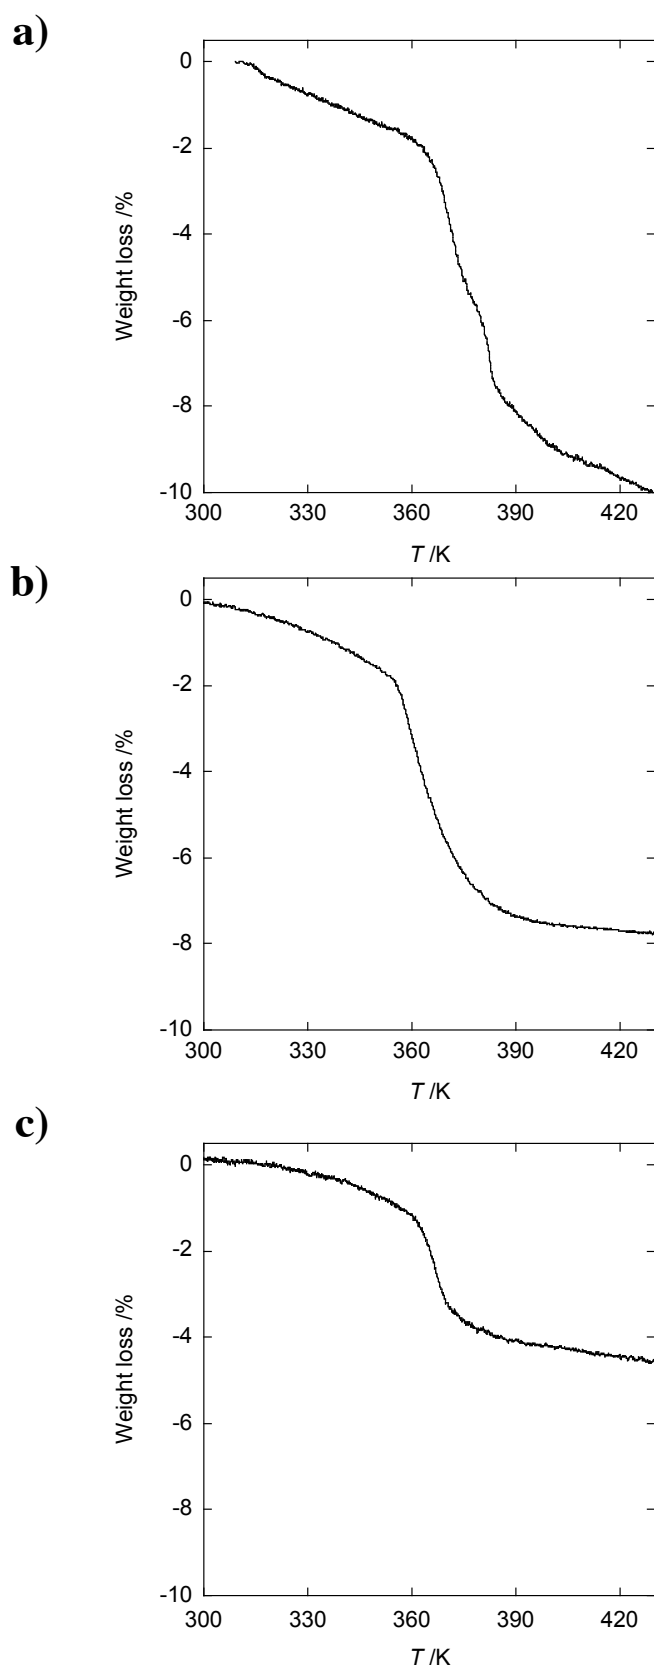

**Figure S1.** TG-DTA curves of a) the solvated **CoC0bpy**, b) the solvated **CoC1bpy**, and c) the solvated **CoC5bpy** recrystallized from toluene/acetonitrile. Each weight loss corresponds to the removal of the solvated toluenes, affording the desolvated samples.

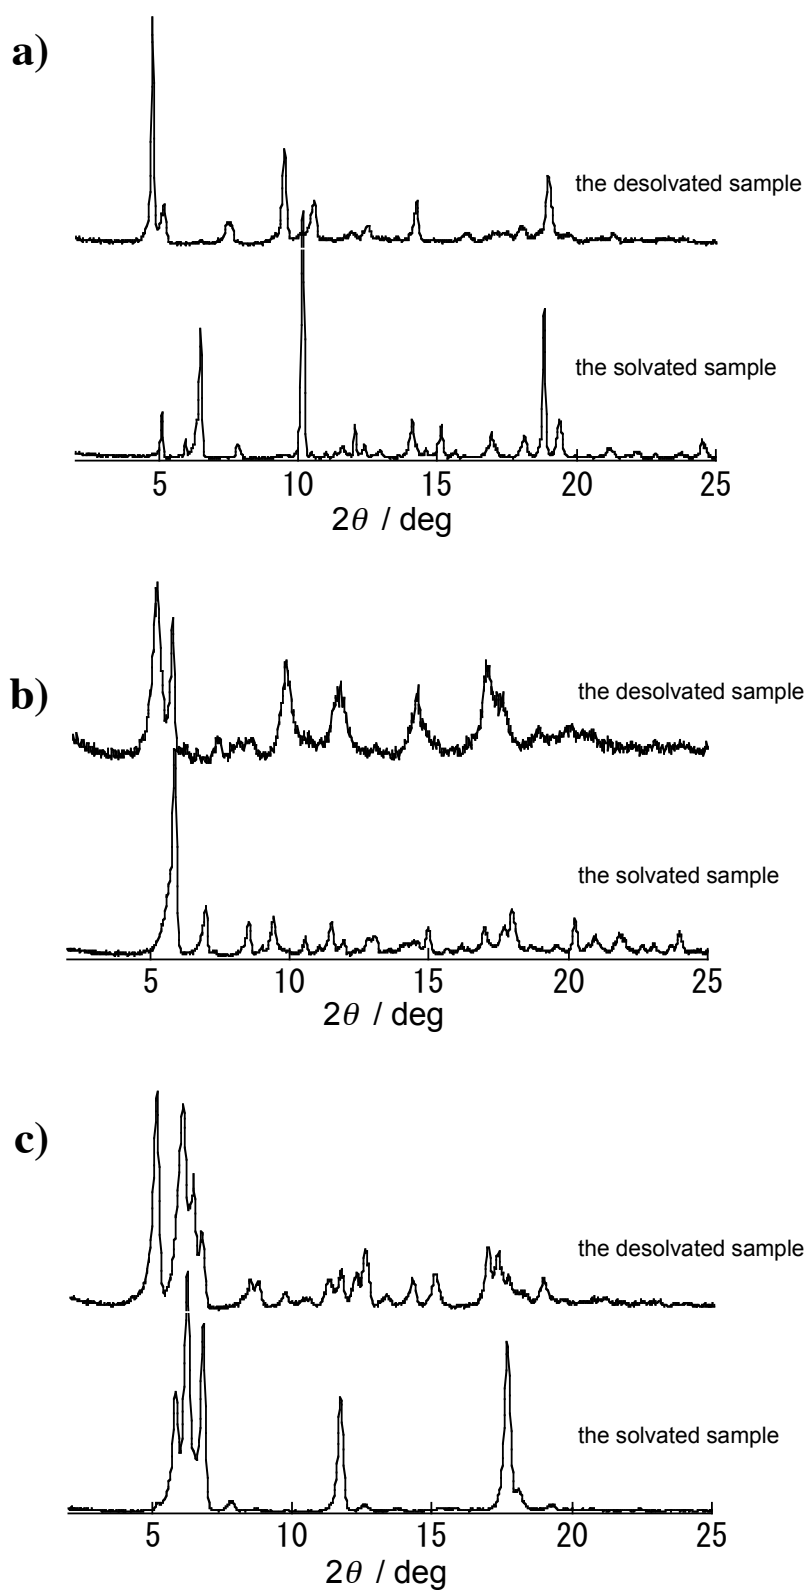

**Figure S2.** XRPD patterns of the solvated **CoCnbp** ( $n = 0, 1$ , and  $5$ ) and the desolvated samples. The observed changes in the XRPD profiles are due to the removal of the toluene.

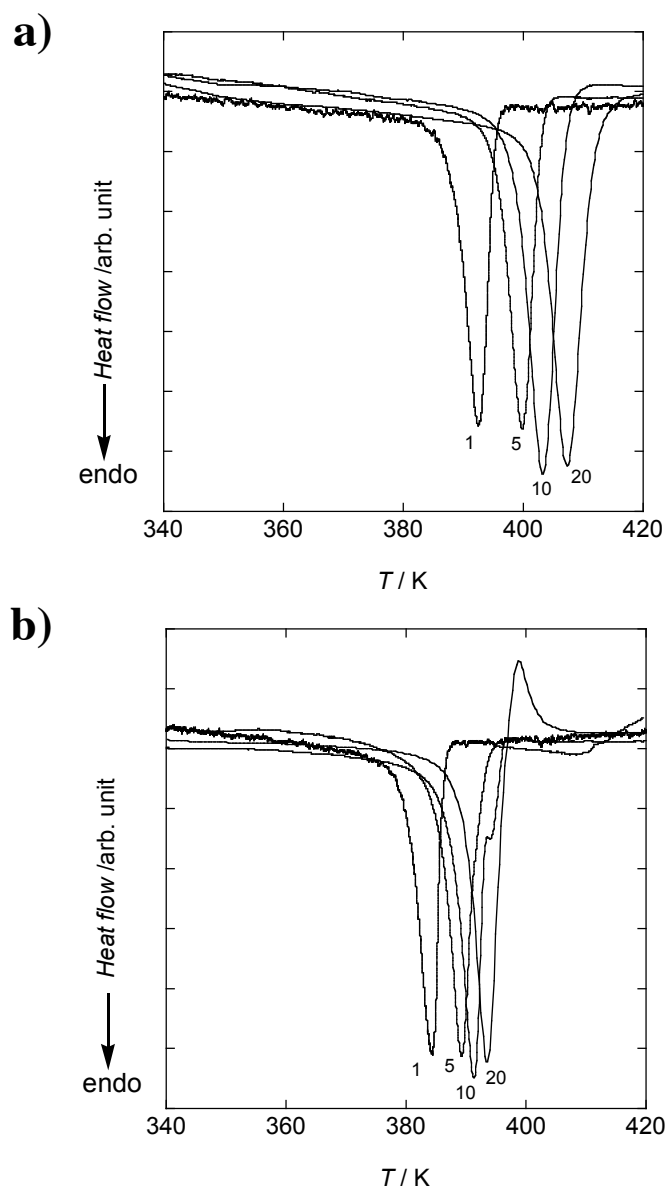

**Figure S3.** DSC curves of a) **CoC9bpy** and b) **CoC13bpy** under a scan rate of 1, 5, 10, and 20 K min<sup>-1</sup>.
